# Supplementary material for: A consensus protocol for the recovery of mercury methylation genes from metagenomes
Source: PubMed Central journal article supplement — Mol Ecol Resour. 2022 Aug 4;23(1):190–204. doi: 10.1111/1755-0998.13687 (PMC10087281; doi:10.1111/1755-0998.13687), 2022-08-04

## Supporting Information

**Figure S1:** Nonpareil curves for the 22 metagenomes. The plot displays the fitted models of the Nonpareil curves. The horizontal dashed lines indicate 100% (gray) and 95% (red) coverage. The empty circles indicate the size and estimated average coverage of the datasets, and the lines after that point are projections of the fitted model.

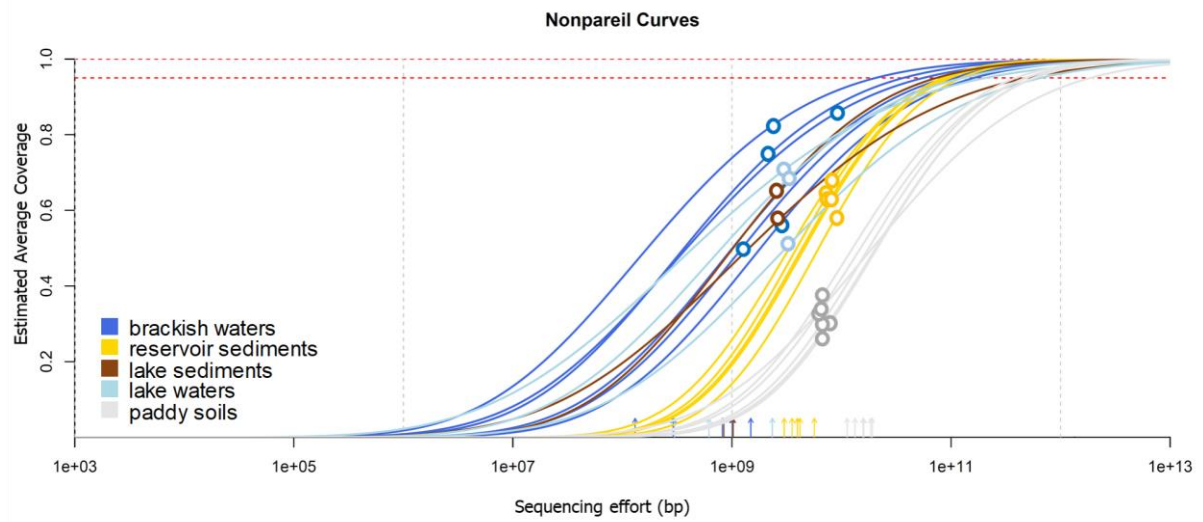

**Figure S2.** Distribution of *hgcA* genes in the 22 metagenomes recovered using the co-assembly 'c' and the single assembly 's' methods and applying the three stringency cutoffs defined in this manuscript for the definition of *hgcA* genes. Abundance values were calculated as *hgcA* coverage values normalized by *rpoB* normalized values. Colors denote taxonomic affiliations of *hgcA* genes.

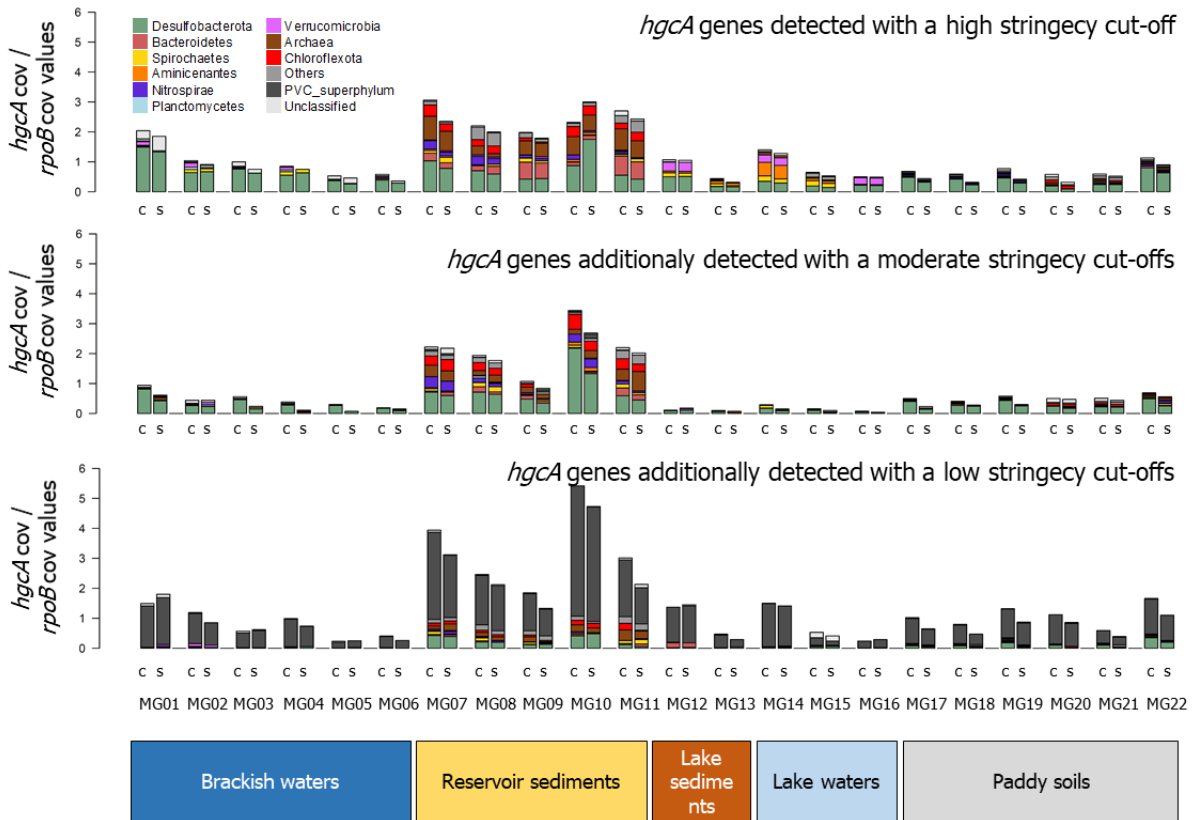

**Figure S3:** Violin boxplots showing, for each metagenome, the difference in *hgcA* sequence length distribution comparing the outputs of the co-assembly and the single assembly approaches.

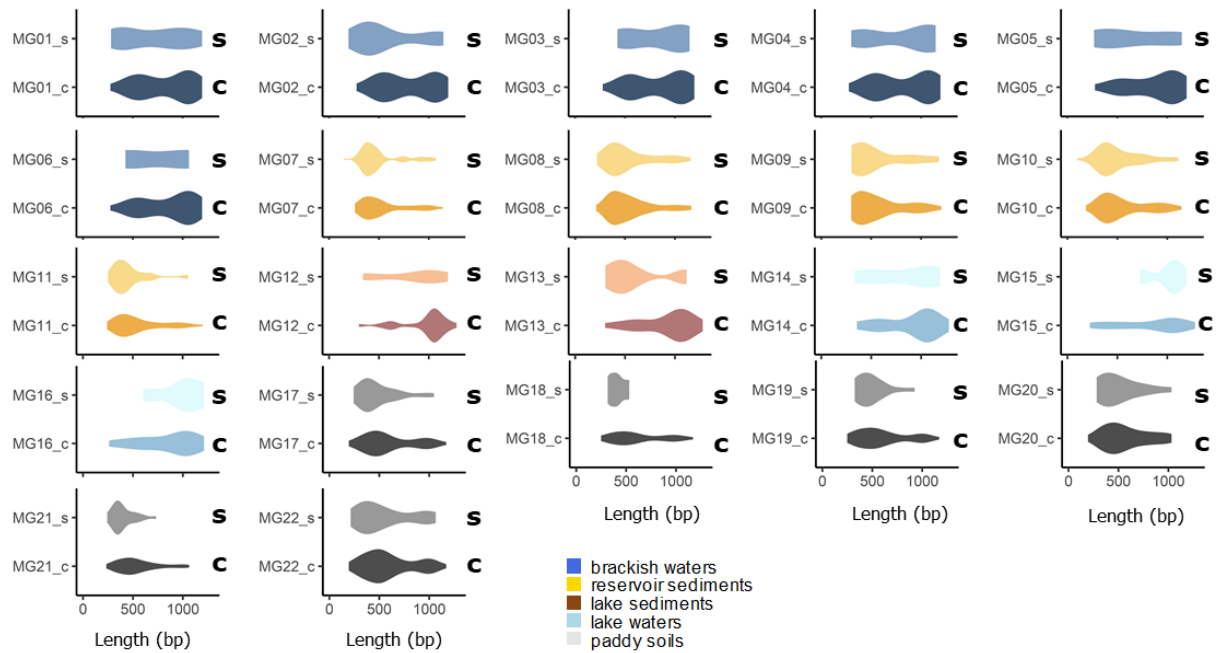

**Figure S4:** Distribution of *hgcA* genes in the 22 metagenomes with the co-assembly (c) and the single assembly (s) methods with different normalization methods

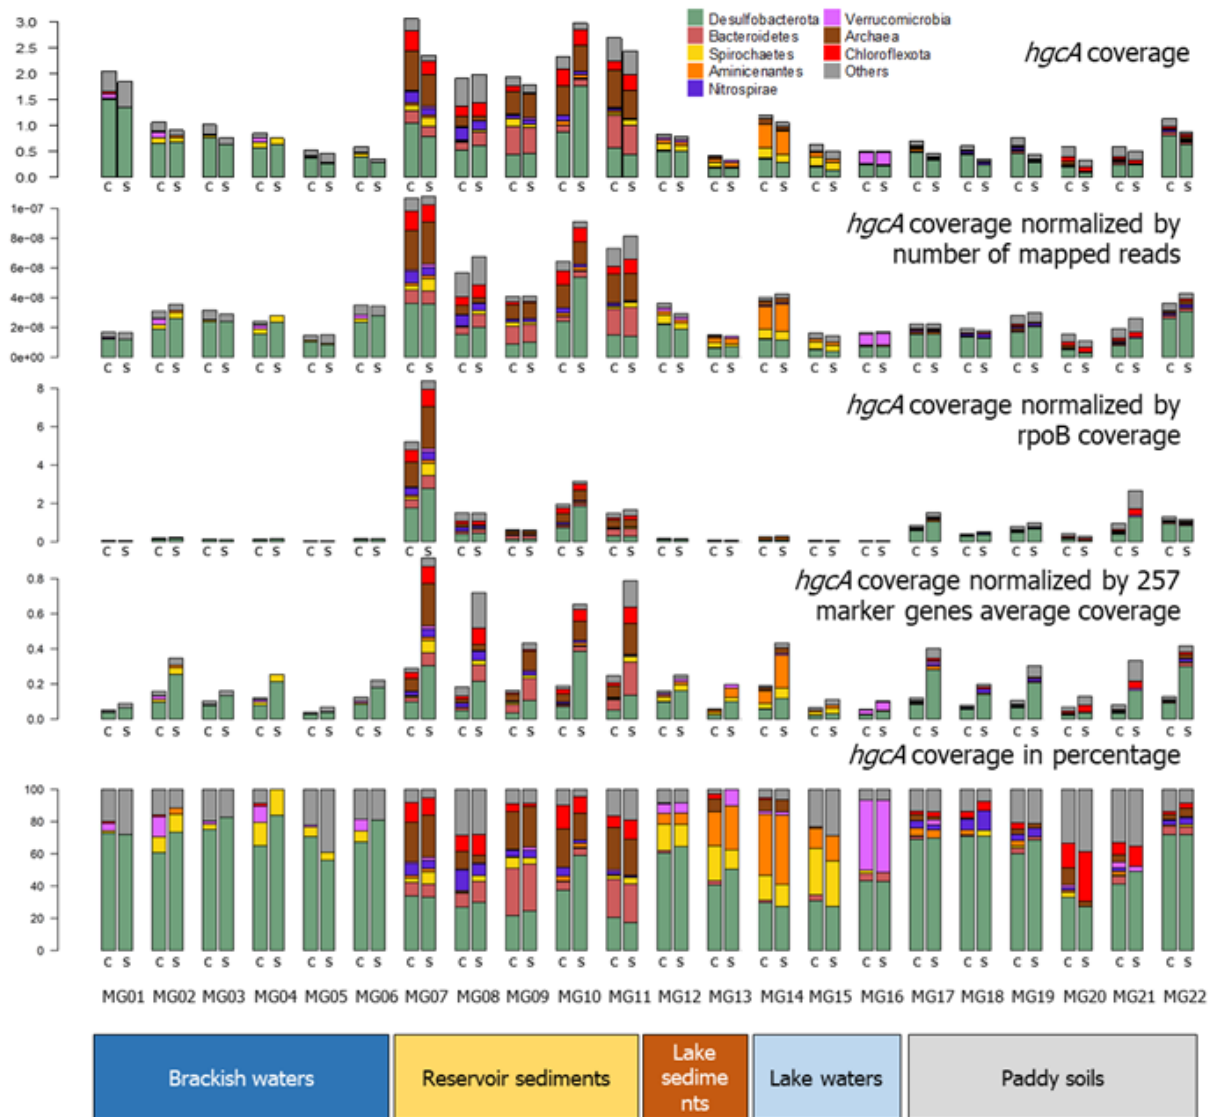

Supplement: MEN-23-190-s002.pdf [file MEN-23-190-s002.pdf]
